# Supplementary material for: Antennal transcriptomic analysis of carboxylesterases and glutathione S-transferases associated with odorant degradation in the tea gray geometrid, Ectropis grisescens (Lepidoptera, Geometridae)
Source: Front Physiol. 2023 Apr 4;14:1183610. doi: 10.3389/fphys.2023.1183610 (PMC10110894; doi:10.3389/fphys.2023.1183610)
Supplement: Supplementary file 2 [file Table3.XLSX]

## Sheet: Sheet1
Table S7 The amino acid identity of the EgriCXEs
	EgriGSTe1	EgriGSTe2	EgriGSTe3	EgriGSTe4	EgriGSTe5	EgriGSTd1	EgriGSTd2	EgriGSTd3	EgriGSTd4	EgriGSTs1	EgriGSTs2	EgriGSTs3	EgriGSTs4	EgriGSTo1	EgriGSTt1	EgriGSTu1
EgriGSTe1	100
EgriGSTe2	30	100
EgriGSTe3	32.42	31	100
EgriGSTe4	31.67	37.12	38.07	100
EgriGSTe5	22.27	27.52	19.67	25	100
EgriGSTd1	27.27	32.75	29.03	35.62	28.86	100
EgriGSTd2	26.48	30.57	30.56	34.7	24.08	40.83	100
EgriGSTd3	18.15	22.52	20.07	24.08	15.72	34.9	30.43	100
EgriGSTd4	26.36	29.26	28.11	32.57	28.05	69.44	41.28	39.26	100
EgriGSTs1	18.45	13.91	16.67	20.09	15.32	19.82	17.43	12	14.68	100
EgriGSTs2	14.16	16.8	14.29	15.15	15.98	17.7	14.85	16.12	16.3	28.05	100
EgriGSTs3	15.14	16.67	12.39	17.62	15.73	17.86	17.18	15.18	17.26	22.87	24.15	100
EgriGSTs4	17.31	12.61	17.14	19.63	15.73	18.72	16.06	13.42	14.22	86.76	28.96	21.52	100
EgriGSTo1	8.89	6.69	10.06	9.17	9.88	8.37	7.8	6.6	6.48	7.35	7.62	5.5	8.33	100
EgriGSTt1	21.21	20.51	19.3	24.02	20.16	23.25	27.83	16.23	26.75	14.47	16.53	19.92	16.09	7.46	100
EgriGSTu1	23.83	26.16	23.71	27.04	19.92	32.03	28.33	23.33	35.93	15.88	16.6	18.99	15.58	7.36	24.17	100
